# Supplementary material
Source: publisher figshare collection journal article supplement (https://acs.figshare.com/ndownloader/files/5886774)
Supplement: Supplementary file 1 [file 5886774]

## Sheet: MSMS
				Chemical	Q1 Mass (Da)	Q3 Mass (Da)	Time (ms)	DP(volts)	EP (volts)	CE (volts)	CXP (volts)
				TCC	312.9	159.9	50	-80	-10	-18	-9
				13C TCC	326	166	50	-80	-10	-18	-9
				TCS	286.607	34.9	50	-50	-10	-30	-3
				13C TCS	298.966	34.9	50	-55	-10	-28	-3
				Methyl PB	150.907	92	50	-60	-10	-30	-5
				13C6 MePB	157	98	50	-60	-10	-30	-5
				Ethyl PB	164.918	92.1	50	-55	-10	-30	-15
				d5 EtPB	170	92	50	-55	-10	-30	-15
				Propyl PB	179.097	92.1	50	-55	-10	-30	-13
				d4 PrPB	183	96	50	-55	-10	-30	-13
				Butyl PB	192.937	92.1	50	-55	-10	-38	-1
				d4 BuPB	197	96	50	-55	-10	-38	-1
				Benzyl PB 1	226.994	92	50	-65	-10	-36	-1
				Benzyl PB 2	226.994	136.1	50	-65	-10	-22	-5

## Sheet: Source
Source Parameters
Collision Gas (CAD	12
Curtain Gas (CUR)	25
Ion Source Gas 1 (GS1)	70
Ion Source Gas 2 (GS2)	50
IonSpray Voltage (IS)	-4500
Temperature(TEM)	500

## Sheet: LC
Solvent A	H2O
Solvent B	MeOH
Time (min)	Solvent B (%)
0.01	50
1	50
6	95
9	95
10	50
10.5	50
11	STOP
Injection Volume	10 uL
Flow Rate	0.2 mL/min
